# Supplementary material
Source: Research Square preprint supplement (doi:10.21203/rs.3.rs-9225376/v1)
Supplement: Supplementary file 1 [file a1e74d4bec1b328f54afd1ad.docx]

Supplementary File 1

Open-ended survey questions

Content:

1. What was the most difficult aspect of your experience with emergency remote teaching while social distancing?
2. What was the most difficult aspect of your experience with virtual sessions?
3. What was the most difficult aspect of your experience with virtual assessment and examinations?
4. What helped you the most to overcome any difficulties you faced?
5. What were your feelings during emergency remote teaching?
6. What coping mechanisms were most helpful for you?
